# Supplementary material
Source: PubMed Central journal article supplement (PMC10841914)
Supplement: NIHMS1934796-supplement-Suppl__Fig_1.pdf [file NIHMS1934796-supplement-Suppl__Fig_1.pdf]

### Tree Structure analyses of Progression of Visual Acuity Decrease in MacTel type 2

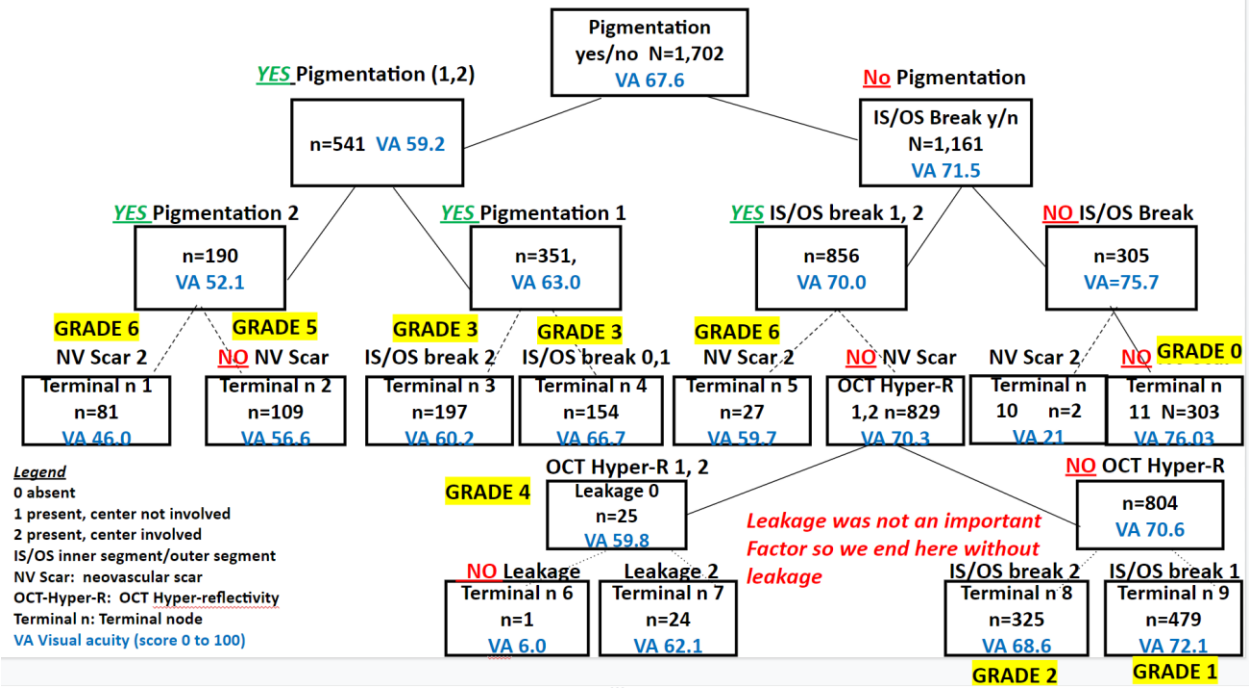

**Supplemental Figure 1.** Chew et al. 7 stage MacTel grades as a decision tree.
