# Supplementary material
Source: PubMed Central journal article supplement (PMC10841914)
Supplement: NIHMS1934796-supplement-Suppl__Fig_6.pdf [file NIHMS1934796-supplement-Suppl__Fig_6.pdf]

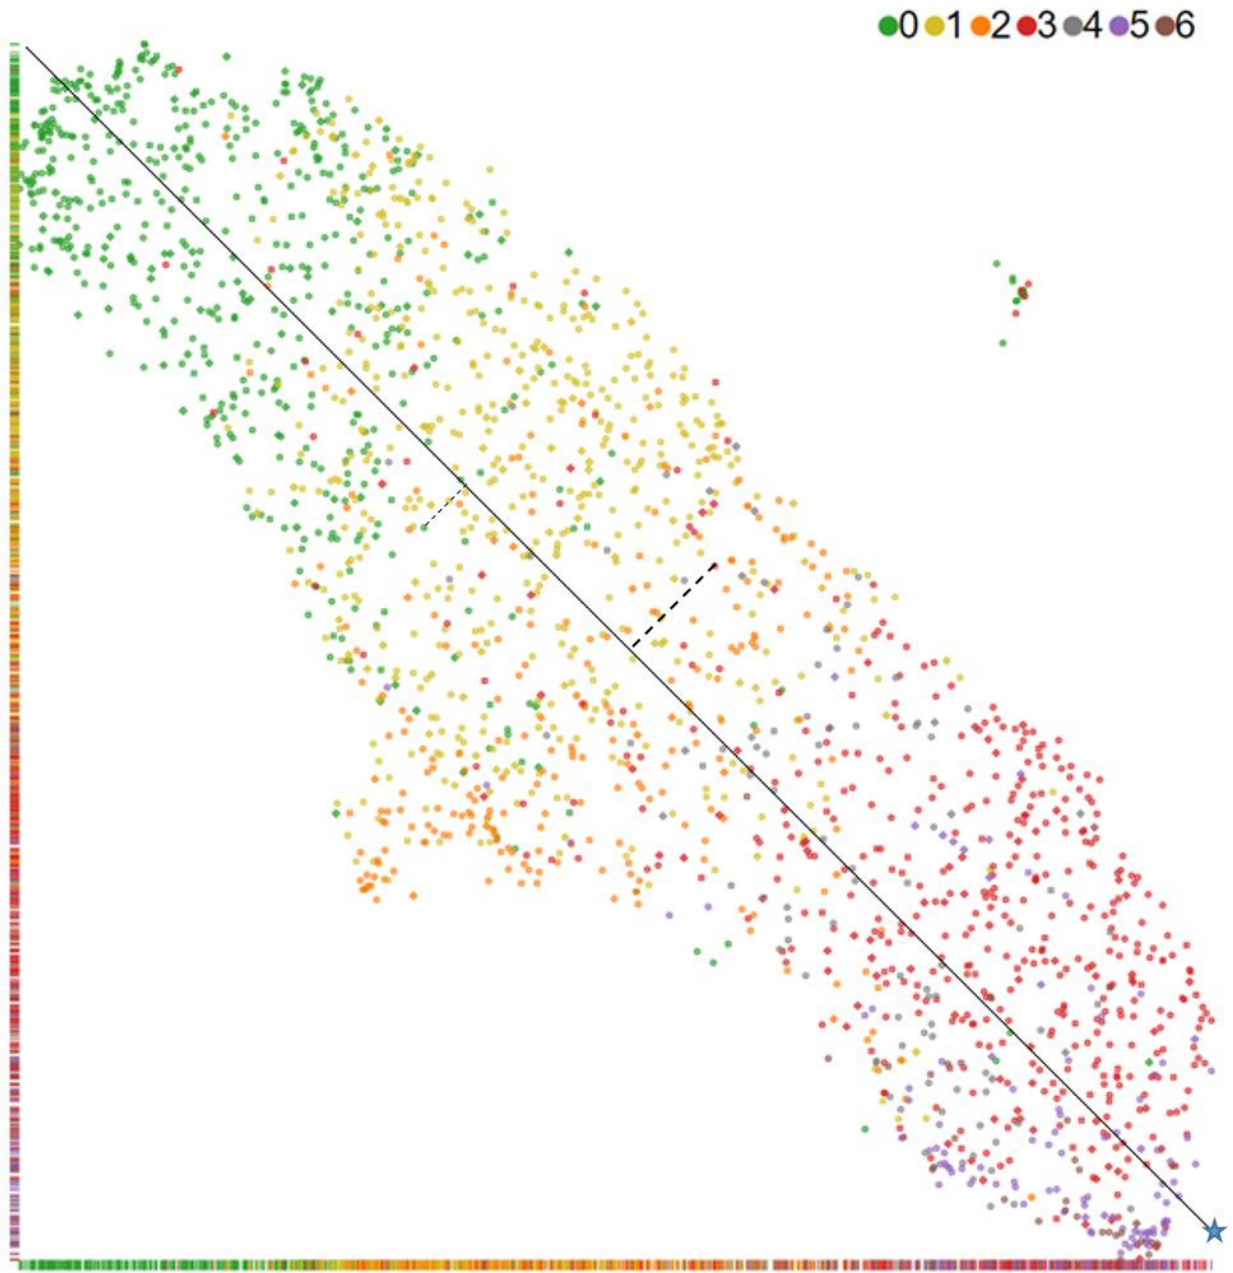

**Supplemental Figure 6.** 2D UMAP embedding of MacTel OCT volumes with 1D UMAP metric line. The UMAP metric for a point is computed by projecting onto the line (dashed line), and computing the distance to the most severe MacTel point on the line in the lower right (star).
