# Supplementary material
Source: PubMed Central journal article supplement (PMC10841914)
Supplement: NIHMS1934796-supplement-Suppl__Fig_7.pdf [file NIHMS1934796-supplement-Suppl__Fig_7.pdf]

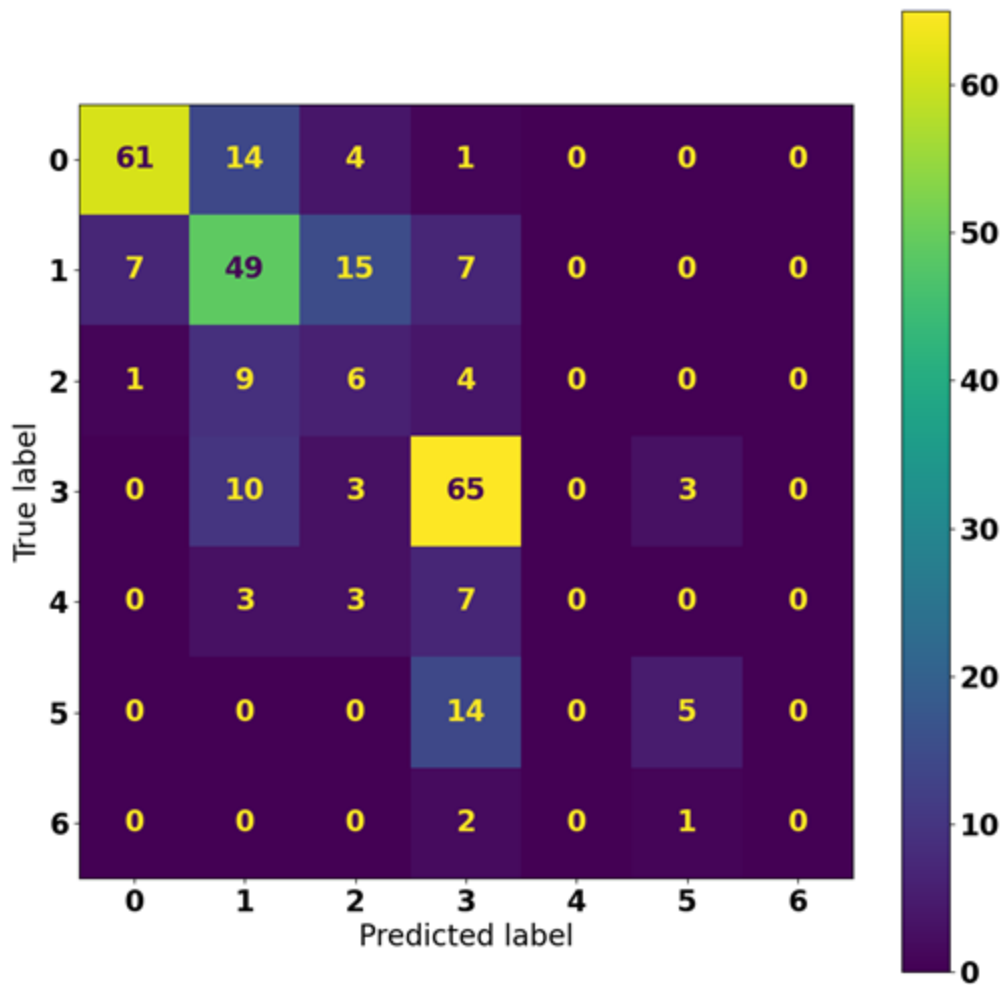

**Supplemental Figure 7.** Test confusion table. The multiview DL classifier model achieved a top-1 accuracy of 63.3% for a 7 class problem. Moreover, when DL misclassified it was always within 2 Chew et al. grades, i.e. neighboring classes.
