# Supplementary material
Source: PubMed Central journal article supplement (PMC10841914)
Supplement: NIHMS1934796-supplement-Suppl__Fig__3.pdf [file NIHMS1934796-supplement-Suppl__Fig__3.pdf]

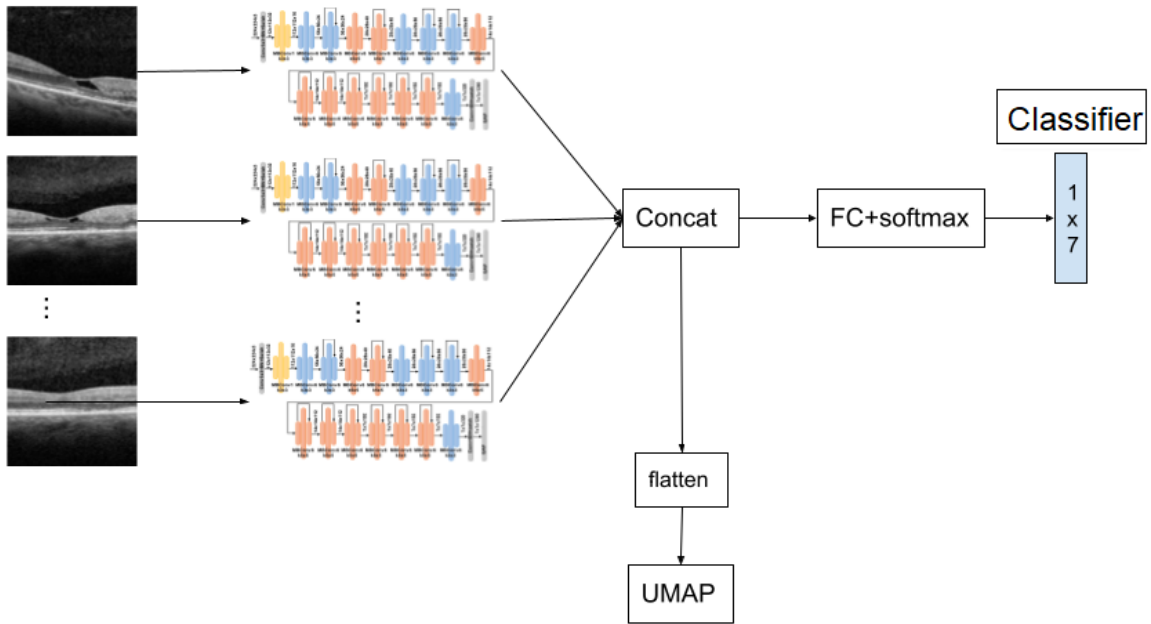

**Supplemental Figure 3.** Schematic of Multi-view classifier and extraction of its last feature layer to learn a UMAP embedding. 20 central B-scans are given as input to a EfficientNet-B0 classifier, and the last layer of trained classifier is extracted as input for the UMAP.
